# Supplementary material for: Construction of FeS2@MoS2 heterostructures for enhanced hydrogen evolution
Source: Royal Society of Chemistry journal article supplement (doi:10.1039/d2se00262k), 2022-01-01
Supplement: d2se00262k1.pdf [file d2se00262k1.pdf]

## Supporting information

*for*

### **Construction of FeS<sub>2</sub>@MoS<sub>2</sub> heterostructures for Enhanced Hydrogen Evolution**

**Dezhi Wang,<sup>ab</sup> Yuwen Song,<sup>a</sup> Ting Guo,<sup>a</sup> Ruoqi Liu,<sup>a</sup> Zhuangzhi Wu<sup>a\*b</sup>**

*<sup>a</sup> School of Materials Science and Engineering, Central South University, Changsha  
410083, China*

*<sup>b</sup> Key Laboratory of Ministry of Education for Non-ferrous Materials Science and  
Engineering, Changsha 410083, China*

\* Correspondence: Z Wu, Fax: +86-731-88830202; E-mail address: [zwu@csu.edu.cn](mailto:zwu@csu.edu.cn)

## Experiment

### *Synthesis of MoS<sub>2</sub>*

0.48 g of Na<sub>2</sub>MoO<sub>4</sub>·2H<sub>2</sub>O and 265 μL HNO<sub>3</sub> were dissolved in 40 mL deionized water and the pH value was adjusted to 1. After magnetic stirring for 1 h, the mixture was transferred into 100 mL Teflon-lined stainless-steel autoclave, and then heated at 180 °C for 10 h to prepare MoO<sub>3</sub>. Next, 0.3 g of CH<sub>3</sub>CSNH<sub>2</sub> was dissolved in 25 mL deionized water, and mixed with 0.086 g of as-gained MoO<sub>3</sub>. After stirring for 10 min, the mixture was put into 100 mL Teflon-lined autoclave and kept at 220 °C for 24 h. The precipitation was washed respectively using water and ethanol for thrice, collected by centrifugation, and then dried in the vacuum at 80 °C for 12 h.

### *Synthesis of FeS<sub>2</sub>*

0.16 g of NaOH and 0.54 g of Fe(NO<sub>3</sub>)<sub>3</sub>·9H<sub>2</sub>O were dissolved in 40 mL deionized water and the pH value was adjusted to 1. After stirring for 1 h, the mixture was put into a 100 mL Teflon-lined stainless-steel autoclave, and kept at 180 °C for 10 h. After being naturally cooled, Fe<sub>2</sub>O<sub>3</sub> could be collected. Subsequently, 0.3 g of CH<sub>3</sub>CSNH<sub>2</sub> was dissolved in 25 mL deionized water, and mixed with 0.032 g of as-prepared Fe<sub>2</sub>O<sub>3</sub>. After stirring for 10 min, the mixture was put into 100 mL Teflon-lined autoclave and heated in an electric oven at 220 °C for 24 h. After being naturally cooled to room temperature, the black precipitation could be collected via centrifugation. And the product was washed respectively using deionized water and absolute ethyl alcohol for thrice and then dried at 80 °C for 12 h in the vacuum.

### ***Materials characterization***

The X-ray diffraction (XRD) patterns of samples were obtained by the D/max-2500 system, using Cu K $\alpha$  radiation from 10° to 80°. Raman data were collected on an instrument LabRAMHR-800 from HORIBA. The surface compositions and chemical states were analyzed via X-ray photoelectron spectroscopy (XPS, Thermo Fischer, America) with an Al K $\alpha$  source. And the morphology and microstructure of specimens were characterized by scanning electron microscopy (SEM, TESCAAN MIRA4) and transmission electron microscopy (TEM, Titan G260-300). Meanwhile, energy dispersive X-ray spectroscopy (EDX) attached to the SEM was used to examine the composition and distribution of elements.

### ***Electrochemical measurements***

Typically, 3 mg of the catalyst was mixed with 200  $\mu$ L of anhydrous ethanol, 800  $\mu$ L of ultra-pure water, and 80  $\mu$ L of Nafion solution (5 wt %). After being sonicated for 30 min, 5  $\mu$ L of the slurry was dropped onto the glassy carbon electrode in a diameter of 3 mm and dried naturally at room temperature. In this work, the HER data of all electrocatalysts were collected on the CHI660D electrochemical workstation (CH Instruments, China). Moreover, the reference electrode was saturated calomel, the counter electrode was carbon rod, and the electrolytes was 0.5 M H<sub>2</sub>SO<sub>4</sub>. The polarization curves were obtained by linear sweep voltammetry (LSV) with a scanning speed of 2 mV s<sup>-1</sup>. Besides, the Tafel curves were carried out on the polarization as follows,

$$\eta = b \log |j| + a \quad (1)$$

where  $\eta$  is the overpotential,  $b$  is the Tafel slope,  $j$  is the current density, and  $a$  is the initial potential of all the samples.

The electrochemical impedance spectroscopy was obtained at an overpotential of 200 mV with the frequencies ranging from 100 kHz to 1 Hz. In order to analyze the electrochemically active surface area (ECSA), we established the linear relationship between the current density and the scanning rate by cyclic voltammetry (CV) with various scan rates (20, 40, 60, 80, 100, 120 and 140 mV s<sup>-1</sup>).<sup>1</sup> The fitted slope was the electrochemical double-layer capacitance ( $C_{dl}$ ), and the ECSA could be calculated as follows,

$$A_{ECSA} = \frac{C_{dl}}{C_0} \quad (2)$$

where  $C_0$  is the generally specific capacitance, which could be regarded as a constant.

To explore the electrochemical stability, the catalyst was coated on carbon cloth and tested by continuous CV and chronoamperometry. And the long-term cycling test was carried out by repeating up to 2000 CV cycles at the potential between -0.4 and 0.1 V vs RHE with 50 mV s<sup>-1</sup>. The chronoamperometric analysis is a constant current test for 10 h when the electrocatalyst reaches a fixed potential for 10 mA cm<sup>-2</sup> to investigate the attenuation of current density.

### ***Computational methods***

Typically, the density functional theory (DFT) calculations were carried out by the Vienna ab initio simulation package code, where the electron-ion interactions

were described via the projected augmented-wave potentials.<sup>2, 3</sup> The exchange-correlation interactions were treated by the Perdew-Burke-Ernzerhof pseudopotentials of generalized gradient approximation.<sup>4</sup> The plane-wave energy cutoff was set as 500 eV, and the convergence threshold was set as 0.05 eV per angstrom in force. For all calculations, the Brillouin zone was simulated by gamma centered Monkhorst-Pack scheme, in which the 2 x 2 x 1 grid was adopted for sampling.<sup>5</sup>

The Gibbs free energy of hydrogen adsorption ( $\Delta G_{H^*}$ ) was calculated as follows:

$$\Delta G_{H^*} = \Delta E_{pot} + \Delta E_{ZPE} - T\Delta S \quad (3)$$

where the  $\Delta E_{pot}$ ,  $\Delta E_{ZPE}$  and the  $\Delta S$  were referred as the changes of potential energy, zero-point energy and entropy. The zero-point energy was calculated by the summation of all vibrational frequencies as follows:

$$E_{ZPE} = \frac{1}{2} \sum \hbar \nu \quad (4)$$

where the  $\nu$  corresponded to the vibrational frequency of each normal mode.<sup>6</sup>

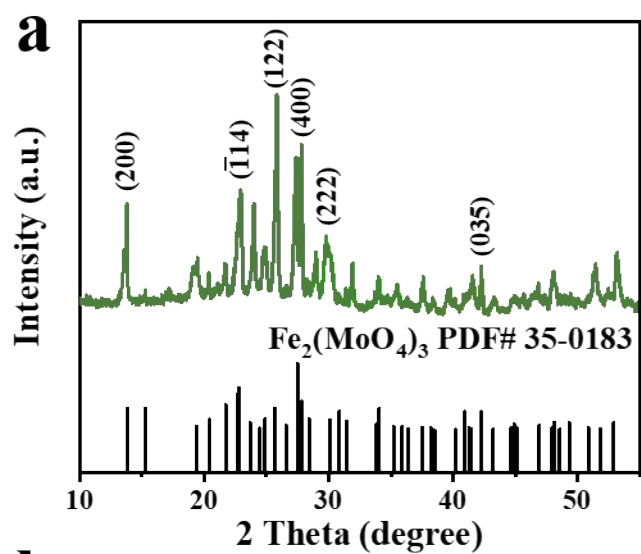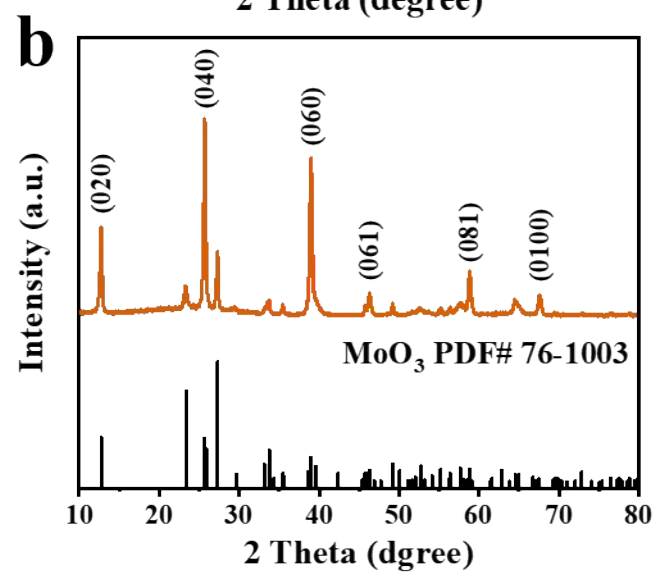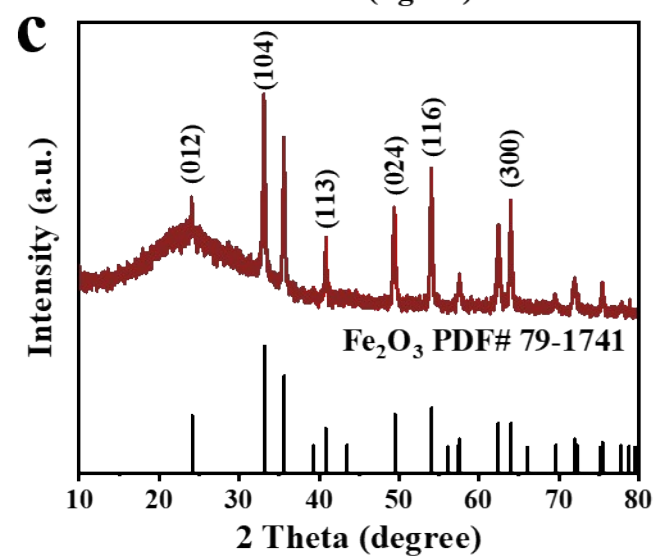

Fig. S1 XRD patterns of (a)  $\text{Fe}_2(\text{MoO}_4)_3$ , (b)  $\text{MoO}_3$  and (c)  $\text{Fe}_2\text{O}_3$ .

Table S1. Mo 3d and S 2p XPS results of various samples.

| Compound                    | Line                          | Peak      | Area        | Ref. |
|-----------------------------|-------------------------------|-----------|-------------|------|
|                             |                               | B.E. (eV) | C.P.S. (eV) |      |
| $\text{FeS}_2@\text{MoS}_2$ | Mo 3d <sub>5/2</sub> (1T)     | 228.3     | 48708.7     | 7    |
|                             | Mo 3d <sub>3/2</sub> (1T)     | 231.5     | 32550.6     |      |
|                             | Mo 3d <sub>5/2</sub> (2H)     | 229.3     | 24057.4     |      |
|                             | Mo 3d <sub>3/2</sub> (2H)     | 232.5     | 16015.3     |      |
|                             | S 2p <sub>3/2</sub> (Mo-S 1T) | 161.2     | 29263.2     | 8    |
|                             | S 2p <sub>1/2</sub> (Mo-S 1T) | 162.5     | 20004.1     |      |
|                             | S 2p <sub>3/2</sub> (Mo-S 2H) | 162.3     | 4741.0      |      |
|                             | S 2p <sub>1/2</sub> (Mo-S 2H) | 163.9     | 3115.5      |      |
|                             | S 2p <sub>3/2</sub> (Fe-S)    | 163.3     | 7814.9      | 9    |
|                             | S 2p <sub>1/2</sub> (Fe-S)    | 164.3     | 5209.9      |      |
| $\text{MoS}_2$              | Mo 3d <sub>5/2</sub> (1T)     | 228.7     | 63019.4     | 10   |
|                             | Mo 3d <sub>3/2</sub> (1T)     | 231.9     | 42110.8     |      |
|                             | Mo 3d <sub>5/2</sub> (2H)     | 229.7     | 29050.9     |      |
|                             | Mo 3d <sub>3/2</sub> (2H)     | 232.9     | 19431.0     |      |
|                             | S 2p <sub>3/2</sub> (Mo-S 1T) | 161.6     | 29757.1     |      |
|                             | S 2p <sub>1/2</sub> (Mo-S 1T) | 162.9     | 20218.7     |      |
|                             | S 2p <sub>3/2</sub> (Mo-S 2H) | 162.8     | 9628.1      |      |
|                             | S 2p <sub>1/2</sub> (Mo-S 2H) | 163.9     | 6564.5      |      |
| $\text{FeS}_2$              | S 2p <sub>3/2</sub> (Fe-S)    | 162.6     | 34719.0     | 11   |

S 2p<sub>1/2</sub> (Fe-S)

163.8

20725.1

---



Table S2. Comparison of the electrocatalytic activity over FeS<sub>2</sub>@MoS<sub>2</sub> with other related electrocatalysts for HER in 0.5 M H<sub>2</sub>SO<sub>4</sub>.

| Catalysts                      | Electrode/supporting material | Loading (mg cm <sup>-2</sup> ) | Onset (mV) | η <sub>10</sub> (mV) | Tafel slope (mV dec <sup>-1</sup> ) | Ref. |
|--------------------------------|-------------------------------|--------------------------------|------------|----------------------|-------------------------------------|------|
| C-1T MoS <sub>2</sub>          | GC                            | 0.280                          | -113       | -156                 | 42.7                                | 12   |
| 2D MoS <sub>2</sub> nanosheets | GC                            | 1.019 × 10 <sup>-3</sup>       | ~-480      | —                    | 40                                  | 13   |
|                                | EPPG                          | 1.267 × 10 <sup>-3</sup>       | ~-450      | —                    | 74                                  |      |
|                                | BDD                           | 1.267 × 10 <sup>-3</sup>       | ~-450      | —                    | 90.9                                |      |
|                                | SPE                           | 1.267 × 10 <sup>-3</sup>       | ~-440      | —                    | 92                                  |      |
| Co <sub>0.85</sub> Se NWs      | GC                            | 0.283                          | -165       | —                    | 58                                  | 14   |
| Co <sub>0.85</sub> Se@CNWs     | GC                            | 0.283                          | -138       | -214                 | 43.4                                |      |
| rGO/MoS <sub>2</sub> -S        | GC                            | 2.000                          | -160       | -250                 | 72                                  | 15   |
| MoS <sub>2</sub> /RGO          | GC                            | 0.285                          | -100       | -156                 | 41                                  | 16   |
| MoS <sub>2</sub> /CNTs         | GC                            | 0.136                          | -90        | -184                 | 44.6                                | 17   |
| MoS <sub>2</sub> @SWNT film    | GC                            | —                              | -92        | -152                 | 41                                  | 18   |

|                                                                            |    |       |      |      |      |              |
|----------------------------------------------------------------------------|----|-------|------|------|------|--------------|
| AS-rich MoS <sub>2</sub><br>nanosheet                                      | GC | 0.285 | -180 | -220 | 68   | 19           |
| Defect rich MoS <sub>2</sub><br>nanosheets                                 | GC | 0.285 | -120 | —    | 50   | 20           |
| H-MoS <sub>2</sub>                                                         | GC | 1.000 | -50  | -167 | 70   | 21           |
| Bulk MoS <sub>2</sub>                                                      | GC | 0.213 | —    | —    | 164  | 22           |
| hH-MoS <sub>2</sub>                                                        | GC | 0.205 | -112 | -214 | 74   | 23           |
| MoS <sub>2</sub> /CNFs                                                     | GC | 0.212 | -224 | -342 | 110  |              |
| Co <sub>9</sub> S <sub>8</sub> @MoS <sub>2</sub> /CN<br>Fs                 | GC | 0.212 | -64  | -190 | 110  | 24           |
| CoS <sub>2</sub> @MoS <sub>2</sub>                                         | GC | 0.213 | -190 | -276 | 60   | 25           |
| MoS <sub>2</sub> /CuS                                                      | GC | 0.471 | -150 | -290 | 63   | 26           |
| MoS <sub>2</sub> /WS <sub>2</sub> /rGO                                     | GC | 1.230 | -113 | -157 | 44   | 27           |
| g-C <sub>3</sub> N <sub>4</sub> /30%<br>FeS <sub>2</sub> /MoS <sub>2</sub> | GC | 0.710 | -107 | -193 | 87.7 | 28           |
| Fe-MoS <sub>2</sub> NF                                                     | CC | 8.900 | -100 | -136 | 82   | 29           |
| MoS <sub>2</sub> /FeS <sub>2</sub>                                         | CC | 1.000 | —    | -134 | 78.6 | 30           |
| FeS <sub>2</sub> @MoS <sub>2</sub>                                         | GC | 0.213 | -133 | -231 | 58   | This<br>work |

Key: —: Value unknown; GC: glassy carbon; EPPG: edge plane pyrolytic graphite;

BDD: boron doped diamond; SPE: screen-printed graphite electrode; CC: carbon

cloth.



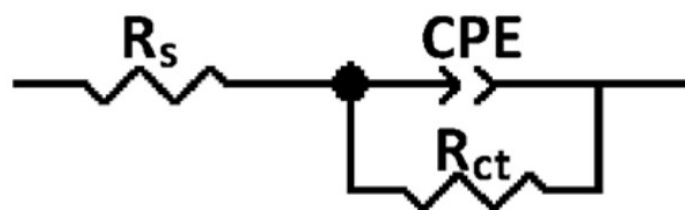

Fig. S2 Equivalent circuit model for electrochemical impedance tests.  $R_s$  is the solution resistance. CPE is the constant phase element of the electric double layer, and  $R_{ct}$  in the low frequency region reflects the charge transfer resistance during HER.

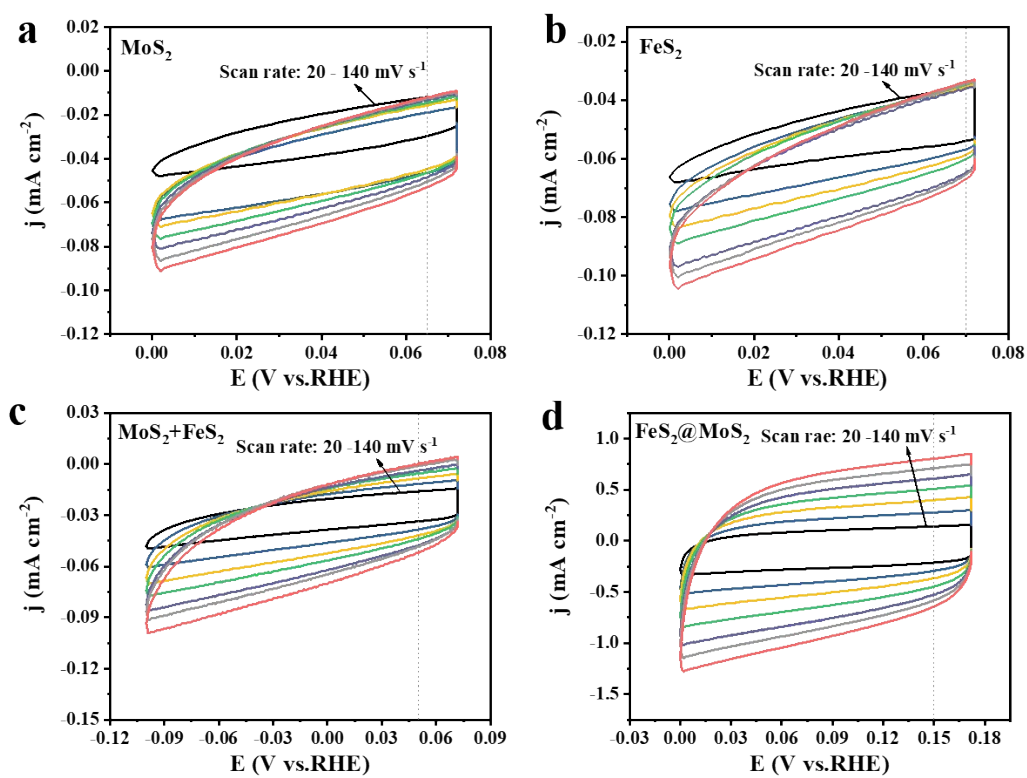

Fig. S3 CV curves at different scan rates of (a)  $\text{MoS}_2$ , (b)  $\text{FeS}_2$ ,  
(c)  $\text{MoS}_2+\text{FeS}_2$ , and (d)  $\text{FeS}_2@\text{MoS}_2$ .

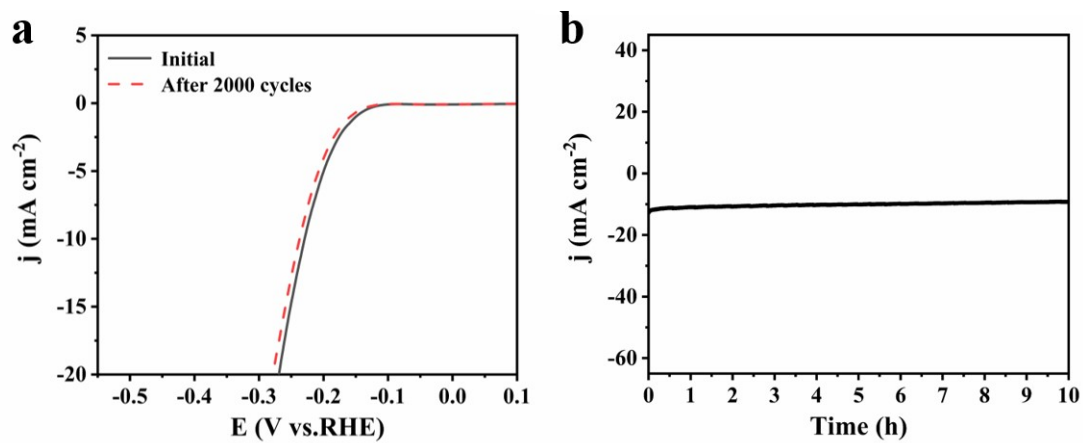

Fig. S4 (a) Polarization curves before and after 2000 cycles and (b) chronopotentiometry of the  $\text{FeS}_2@MoS_2$  catalyst performed at 10  $\text{mA cm}^{-2}$  for 10 h.

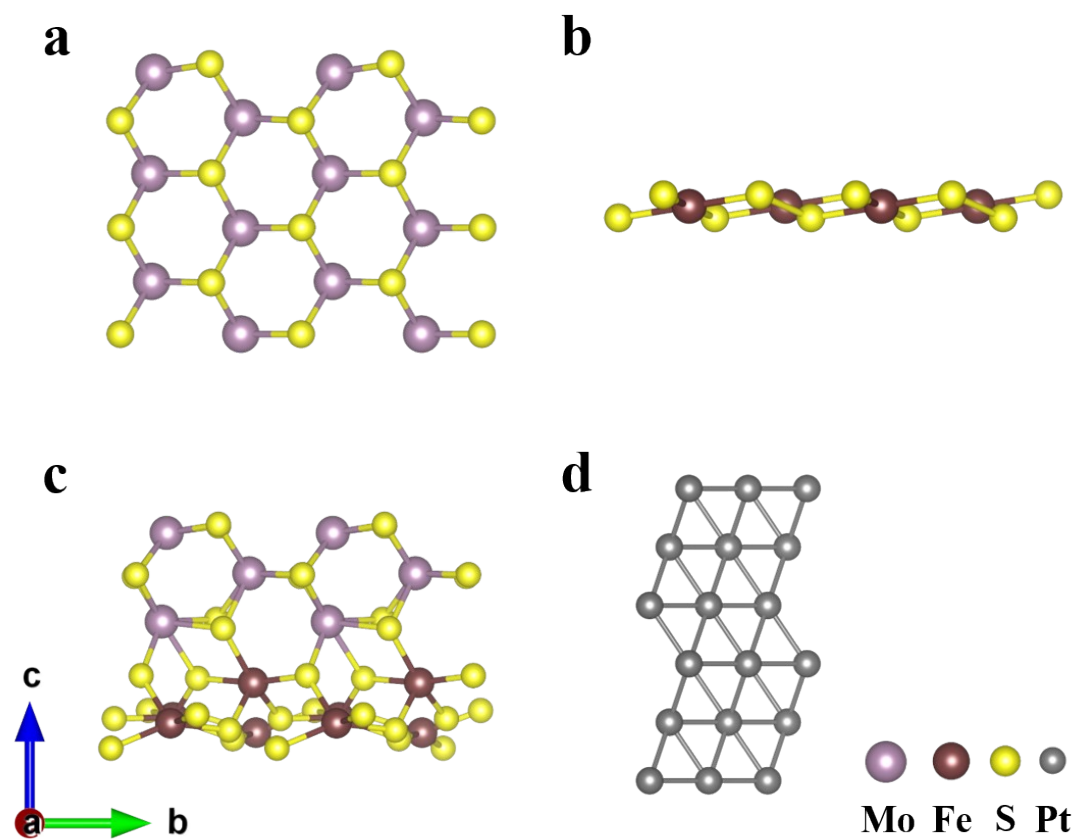

Fig. S5 The theoretical models of (a)  $\text{MoS}_2$ , (b)  $\text{FeS}_2$ , (c)  $\text{FeS}_2@\text{MoS}_2$  and (d) Pt.

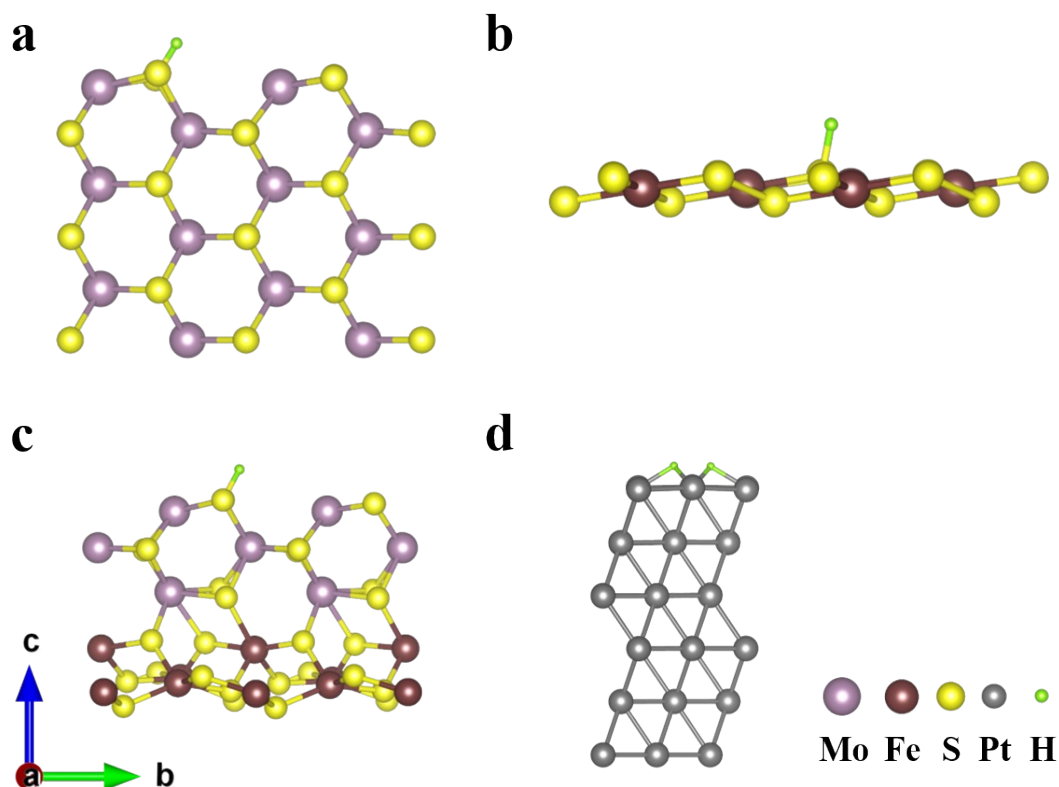

Fig. S6 The theoretical models of (a)  $\text{H}^*\text{MoS}_2$ , (b)  $\text{H}^*\text{FeS}_2$ , (c)  $\text{H}^*\text{FeS}_2@\text{MoS}_2$  and (d)  $\text{H}^*\text{Pt}$ .

## References:

- 1 S. Trasatti and O. A. Petrii, *J. Electroanal. Chem.*, 1992, **327**, 353-376..
- 2 G. G. Kresse and J. J. Furthmüller, *Phys. Rev. B Condens. Matter*, 1996, **54**, 11169-11186.
- 3 P. Chl, *Phys. Rev. B*, 1994, **50**, 17953-17979.
- 4 J. P. Perdew, K. Burke and M. Ernzerhof, *Phys. Rev. Lett.*, 1996, **77**, 3865-3868.
- 5 X. Zhang, X. Liu, G. Liang, L. Rui and Y. Bing, *J. Quant. Spectrosc. Radiat. Transfer*, 2016, **168**, 66-77.
- 6 Y. Li, S. H. Chan and Q. Sun, *Nanoscale*, 2015, **7**, 8663-8683.
- 7 K. Chang, X. Hai, H. Pang, H. Zhang, L. Shi, G. Liu, H. Liu, G. Zhao, M. Li and J.



- Ye, *Adv. Mater.*, 2016, **28**, 10033-10041.
- 8 Q. Zhang, Y. Wang, X. Zhu, X. Liu and H. Li, *Appl. Surf. Sci.*, 2021, **556**, 149768.
- 9 B. Tang, Z. Yu, H. L. Seng, N. Zhang, X. Liu, Y. Zhang, W. Yang and H. Gong, *Nanoscale*, 2018, **10**, 20113-20119.
- 10 N. T. Xuyen and P. J. Ting, *Chem. Eur. J.*, 2017, **23**, 17348-17355.
- 11 J. Xia, J. Jiao, B. Dai, W. Qiu, S. He, W. Qiu, P. Shen and L. Chen, *RSC Adv.*, 2013, **3**, 6132-6141.
- 12 Y. Li, L. Wang, S. Zhang, X. Dong, Y. Song, T. Cai and Y. Liu, *Catal. Sci. Technol.*, 2017, **7**, 718-724.
- 13 S. J. Rowley-Neale, D. A. Brownson, G. C. Smith, D. A. Sawtell, P. J. Kelly and C. E. Banks, *Nanoscale*, 2015, **7**, 18152-18168.
- 14 B. Sun, X. Wang, D. Yang and Y. Chen, *RSC Adv*, 2019, **9**, 17238-17245.
- 15 S. Kamila, B. Mohanty, A. K. Samantara, P. Guha, A. Ghosh, B. Jena, P. V. Satyam, B. K. Mishra and B. K. Jena, *Sci. Rep.*, 2017, **7**, 8378.
- 16 Y. Li, H. Wang, L. Xie, Y. Liang, G. Hong and H. Dai, *J. Am. Chem. Soc.*, 2011, **133**, 7296-7299.
- 17 Y. Yan, X. Ge, Z. Liu, J. Wang, J. Lee and X. Wang, *Nanoscale*, 2013, **5**, 7768.
- 18 D. Liu, W. Xu, Q. Liu, Q. He, Y. A. Haleem, C. Wang, T. Xiang, C. Zou, W. Chu, J. Zhong, Z. Niu and L. Song, *Nano Res*, 2016, **9**, 2079-2087.
- 19 N. Liu, Y. Guo, X. Yang, H. Lin, L. Yang, Z. Shi, Z. Zhong, S. Wang, Y. Tang and Q. Gao, *ACS Appl. Mater. Inter.*, 2015, **7**, 23741-23749.
- 20 J. Xie, H. Zhang, S. Li, R. Wang, X. Sun, M. Zhou, J. Zhou, X. Lou and Y. Xie,

- Adv. Mater.*, 2013, **25**, 5807-5813.
- 21 J. Zhang, S. Liu, H. Liang, R. Dong and X. Feng, *Adv. Mater.*, 2015, **27**, 7426-7431.
- 22 D. Wang, X. Zhang, S. Bao, Z. Zhang, H. Fei and Z. Wu, *J. Mater. Chem. A*, 2017, **5**, 2681-2688.
- 23 B. Guo, K. Yu, H. Li, H. Song, Y. Zhang, X. Lei, H. Fu, Y. Tan and Z. Zhu, *ACS Appl. Mater. Inter.*, 2016, **8**, 5517-5525.
- 24 H. Zhu, J. Zhang, R. Y. Zhang, M. Du, Q. Wang, G. Gao, J. Wu, G. Wu, M. Zhang, B. Liu, J. Yao and X. Zhang, *Adv. Mater.*, 2015, **27**, 4752-4759.
- 25 Q. Wei, Z. Ye, X. Ren, X. Li and F. Fu, *J. Alloys Compd.*, 2020, **835**, 155264.
- 26 L. Zhang, Y. Guo, A. Iqbal, B. Li, D. Gong, W. Liu, K. Iqbal, W. Liu and W. Qin, *Int. J. Hydrogen Energ.*, 2018, **43**, 1251-1260.
- 27 H. J. Lee, S. W. Lee, H. Hwang, S. I. Yoon, Z. Lee and H. S. Shin, *Mater. Chem. Front.*, 2021, **5**, 3396-3403.
- 28 Y. Li, S. Zhu, Y. Xu, R. Ge, J. Qu, M. Zhu, Y. Liu, J. M. Cairney, R. Zheng, S. Li, J. Zhang and W. Li, *Chem. Eng. J.*, 2021, **421**, 127804.
- 29 Z. Xue, M. Xiao, Q. Lu, Q. Li and X. Yang, *Electrochim. Acta*, 2017, **249**, 72-78.
- 30 Y. Chen, Z. Peng, Y. Guo, S. Guan and X. Fu, *Solid State Sci.*, 2020, **101**, 106156.
